# Supplementary material
Source: PubMed Central journal article supplement (PMC3811682)
Supplement: MCB.00623-13_zmb999100147so1.pdf [file MCB.00623-13_zmb999100147so1.pdf]

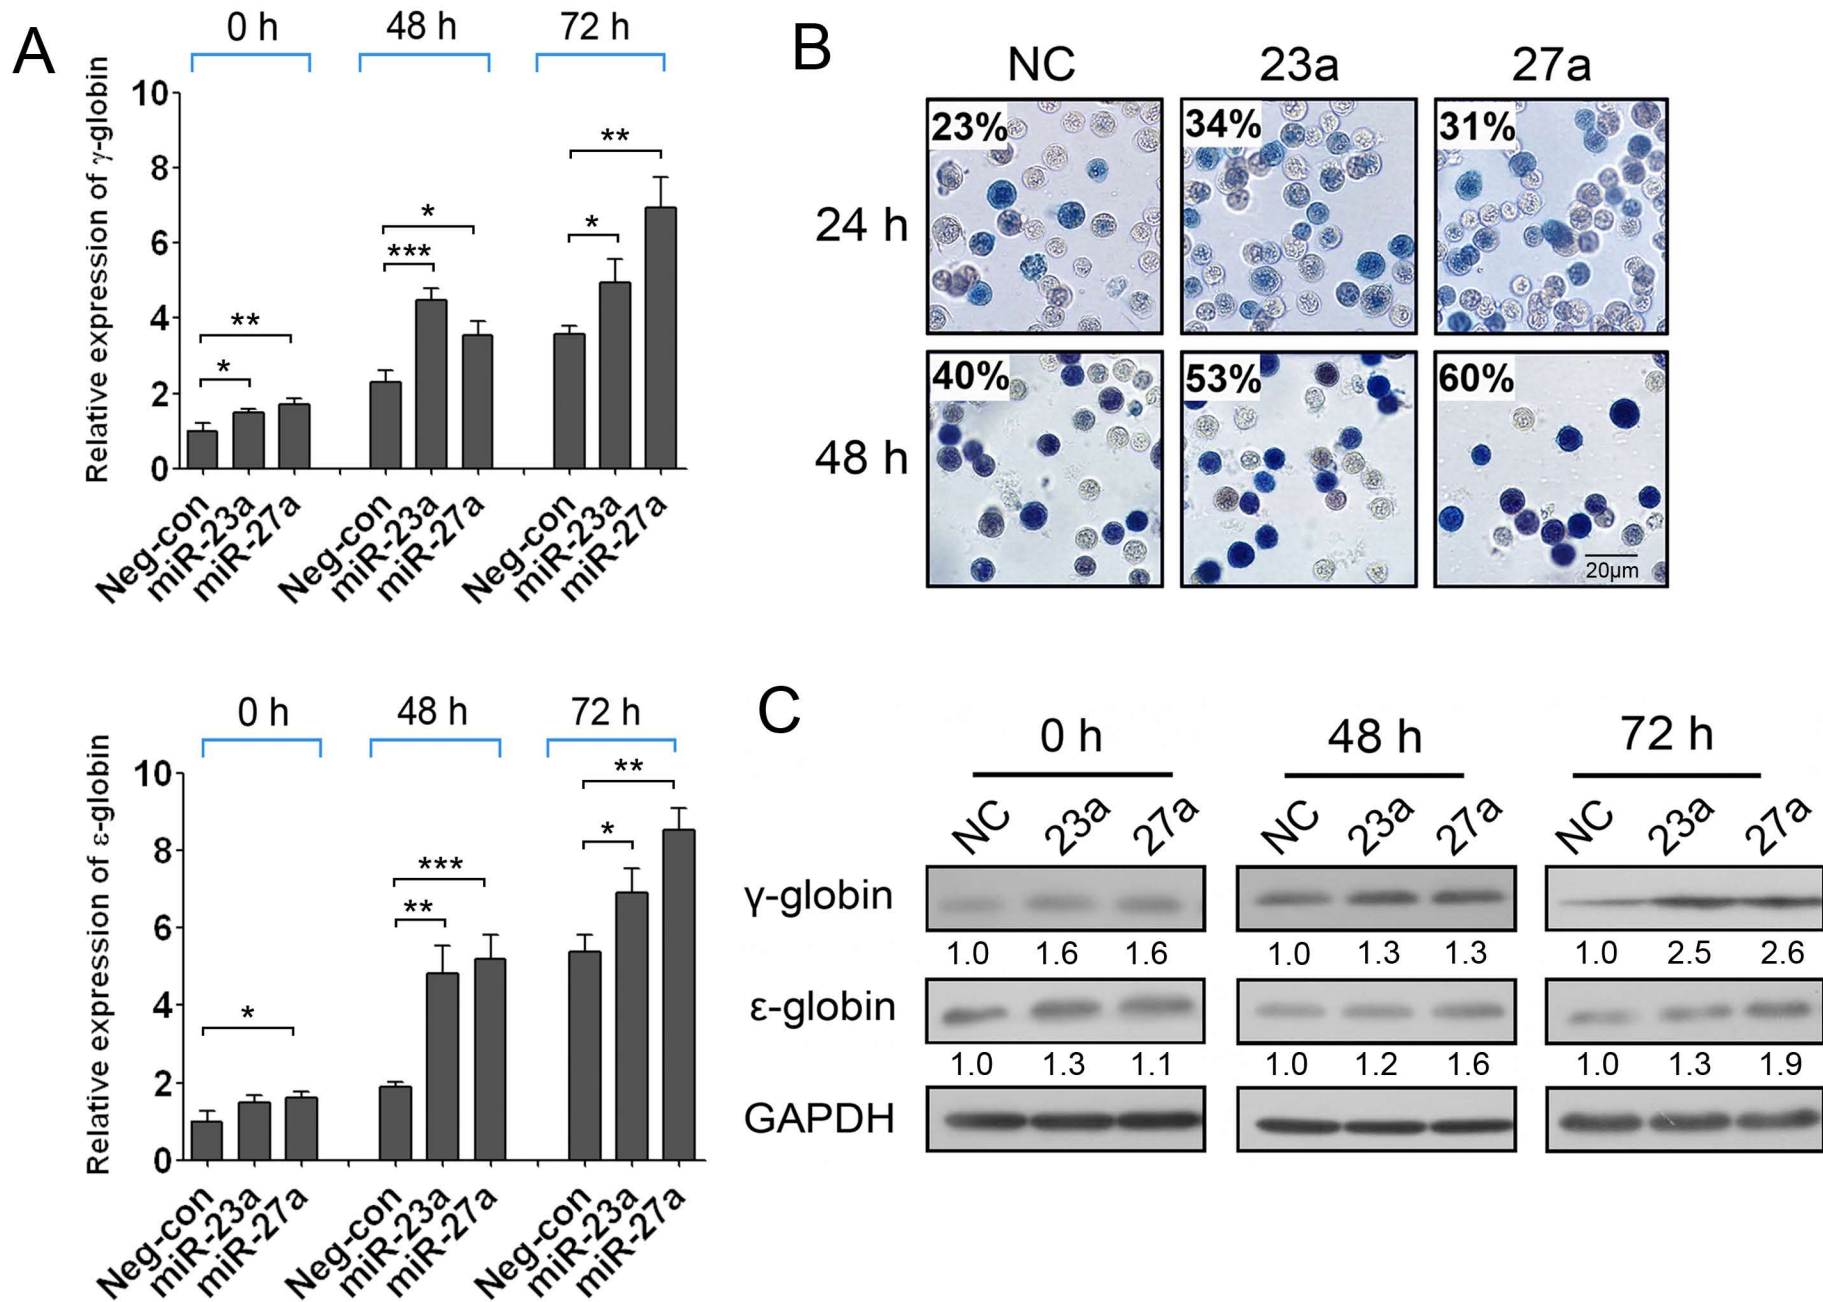

FIG. S1 Transfection of miR-23a or 27a mimics up-regulated  $\beta$ -like globin genes in K562 cells. (A) Q-PCR analysis of  $\epsilon$ - and  $\gamma$ - globin gene expression in miR-23a and 27a overexpressing K562 cells at hemin-induced 0, 48 and 72 hours. (B) Benzidine staining of miR-23a and 27a overexpressing K562 cells at hemin-induced 24 and 48 hours. (C) Western Blot analysis of  $\epsilon$ - and  $\gamma$ - globin expression in K562 cells described in (A).
