# Supplementary material
Source: PubMed Central journal article supplement (PMC3811682)
Supplement: MCB.00623-13_zmb999100147so2.pdf [file MCB.00623-13_zmb999100147so2.pdf]

A

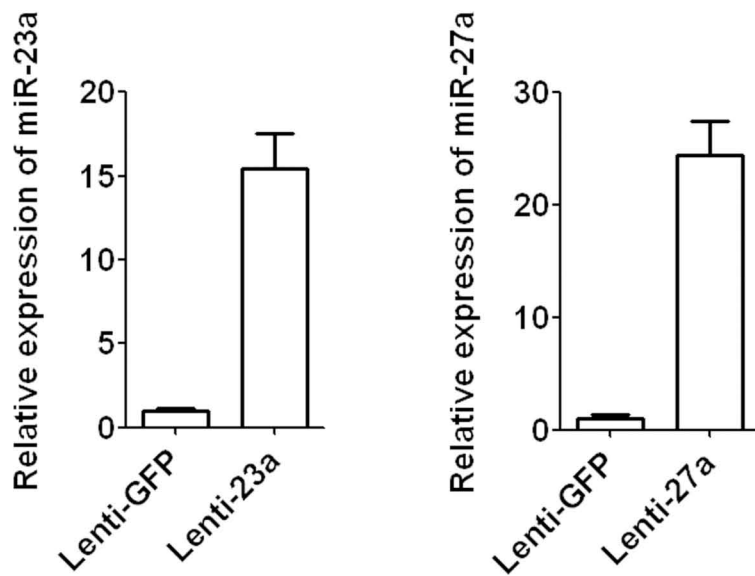

B

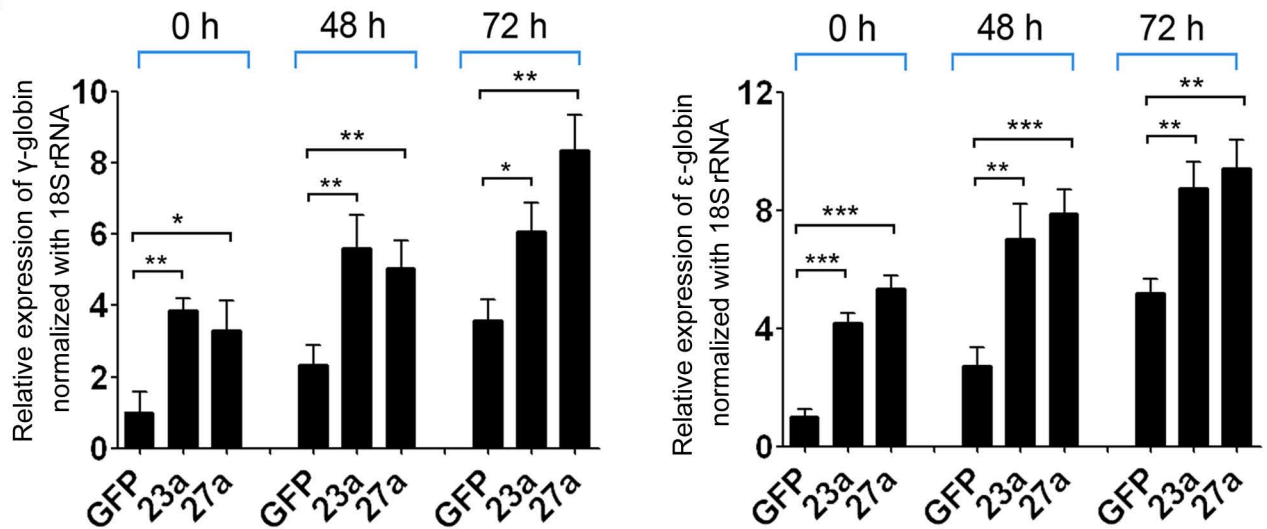

FIG. S2 Infection of lentivirus expressing miR-23a or 27a up-regulated  $\beta$ -like globin genes in K562 cells

(A) Relative expression of miR-23a and 27a in K562 cells infected with lentivirus expressing miR-23a or 27a. (B) Q-PCR analysis of  $\gamma$ - and  $\epsilon$ -globin gene expression normalized with 18S rRNA in lentivirus-infected K562 cells.
