# Supplementary material
Source: PubMed Central journal article supplement (PMC3811682)
Supplement: MCB.00623-13_zmb999100147so3.pdf [file MCB.00623-13_zmb999100147so3.pdf]

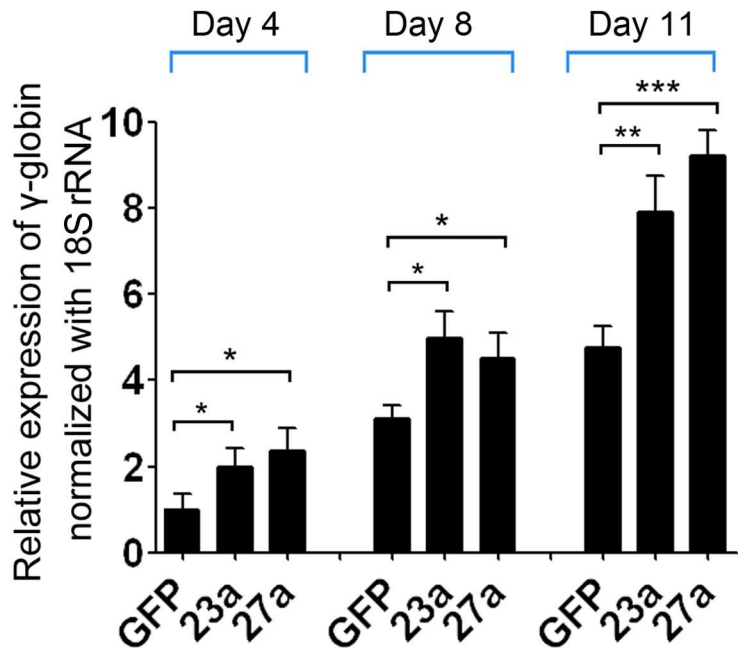

FIG. S3 The expression of  $\gamma$ -globin gene normalized with 18S rRNA in lentivirus-infected human CD34<sup>+</sup> HPCs after Epo induction for 4, 8 and 11 days.
