# Supplementary material
Source: PubMed Central journal article supplement (PMC3811682)
Supplement: MCB.00623-13_zmb999100147so4.pdf [file MCB.00623-13_zmb999100147so4.pdf]

## A 3' -UTR of KLF3

```

90.....200.....210.....220.....
Hsa >CACGGGUCAGACCUAAAGAAUGUGAACA-----CUU--UUU
Ptr >CACGGGUCAGACCUAAAGAAUGUGAACA-----CUU--UUU
Mml >CACGGGUCAGACCUAAAGAAUGUGAACA-----CUU--UUU
Oga >CACGGGUCAGACCUAAAGAAUGUGAACA-----C-----
Tbe -----UU--UUU
Mmu >CACGGGUCAGACCUAAAGAAUGUGAAC-----A-----
Rno >CACGGGUCAGACCUAAAGAAUGUGAAC-----A-----
Cpo >CACGGGUCAGACCUAAAGAAUGUGAAC-----A-----
Ocu >CACGGGUCAGACCUAAAGAAUGUGAACA-----C-U--UUU
Sar >CACGGGUCAGACCUAAAGAAUGUGAACA-----CUU--UUU
Eeu >CACGGGUCAGACCUAAAGAAUGUGAAC-----AAU--UAU
Cfa >CACGGGUCAGACCUAAAGAAUGUGAACA-----CUU--UUU
Fca >CACGGGUCAGACCUAAAGAAUGUGAACA-----CUU--UUU
Eca >CACGGGUCAGACCUAAAGAAUGUGAACA-----C-----UUU
Bta >CACGGGUCAGACCUAAAGAAUGUGAACA-----CUU-----
Dno >CACGGGUCAGACCUAAAGAAUGUGAACA-----C-----U-----
Laf >CACGGGUCAGACCUAAAGAAUGUGAACA-----C-----U-----
Ete >CACGGGUCAGACCUAAAGAAUGUGAACA-----C-----U-----

```

↑  
Potential binding site for miR-23a

## B 3' -UTR of SP1

```

640.....1650.....1660.....1670.....1680.
Hsa >UAUCUUGUUAGAGAG-C-UUUUCACUGUGAGG-AAGUGUGGAAAAA
Ptr >UAUCUUGUUAGAGAG-C-UUUUCACUGUGAGG-AAGUGUGGAAAAA
Mml >UAUCUUGUUAGAGAG-C-UUUUCACUGUGAGG-AAGUGUGGAAAAA
Oga >UAUCUUGUUAGAGAG-C-UUUUCACUGUGAGG-AAGUGUGG--AAA
Tbe >UAUCUUGUUAGAGAG-C-UUUUCACUGUGAGG-AAGUGUGG--AAA
Mmu >UAUCUUGUCAGAGAG-C-UUUUCACUGUGAGG-AAGUAUGG--GAG
Rno >UAUCUUGUCAGAGAG-C-UUUUCACUGUGAGG-AAGUAUGA--AAG
Cpo >UAUCUUGUUAGAGAG-C-UUUUCACUGUGAGG-AAGUGUGG--AAA
Ocu >UAUCUUGUUAGAGAG-C-UUUUCACUGUGAGG-AAGUGUGG--AAA
Sar >UAUCUUGUUAGAGAG-A-UUUUCACUGUGAGU-AAGUGUGG--AAA
Eeu >UAUCUUGUCAGAGAG-CUUUUUCACUGUGAGG-AAGUGUGG--AGA
Cfa >UAUCCUGUCAGAGAG-C-UUUUCACUGUGAGG-AAGUGUGG--AAA
Fca >UAU-CUGUCAGAGAG-C-UUUUCACUGUGAGG-AAGUGUGG--AAA
Eca >UAACUUGUCAGAGAG-C-UUUUCACUGUGAGG-AAGUGUGG--AAA
Bta >UAUCUCGUCAGAGAG-C-UUUUCACUGUGAGG-AAGUGUGG--AAA
Dno >UAUUUUGUCAGAGAG-C-UUUUCACUGUGAGG-AAGUGUGG--AAA
Laf >UAUCUUGUCAGAGAG-C-UUUUCACUGUGAGG-AAGUGUGG--AAA
Ete >UAUCUUGUCAGAGAGCC-UUUUCACUGUGAGGAAAGUCUGG--AAA

```

↑  
Potential binding site for miR-27a

FIG. S4 The conservatism of the 3' -UTR of KLF3 and SP1 in multiple species.
