# Supplementary material
Source: PubMed Central journal article supplement (PMC3811682)
Supplement: MCB.00623-13_zmb999100147so5.pdf [file MCB.00623-13_zmb999100147so5.pdf]

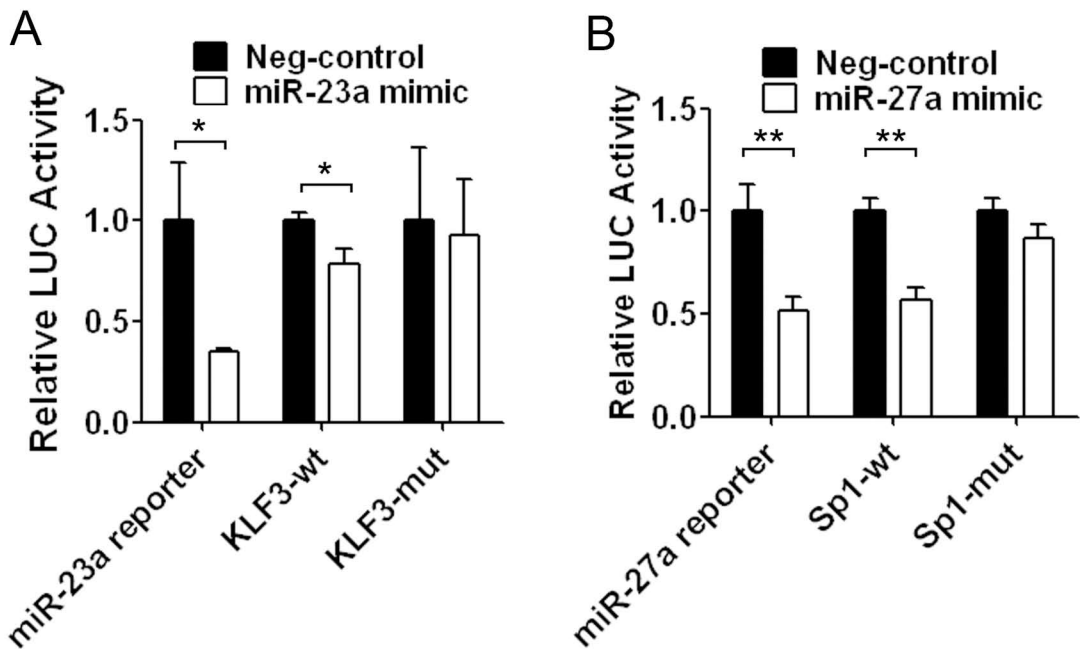

FIG. S5 The relative luciferase activity of the reporter constructs co-transfected with scrambled or miR-23a/27a mimics in K562 cells.
