# Supplementary material
Source: PubMed Central journal article supplement (PMC3811682)
Supplement: MCB.00623-13_zmb999100147so6.pdf [file MCB.00623-13_zmb999100147so6.pdf]

A

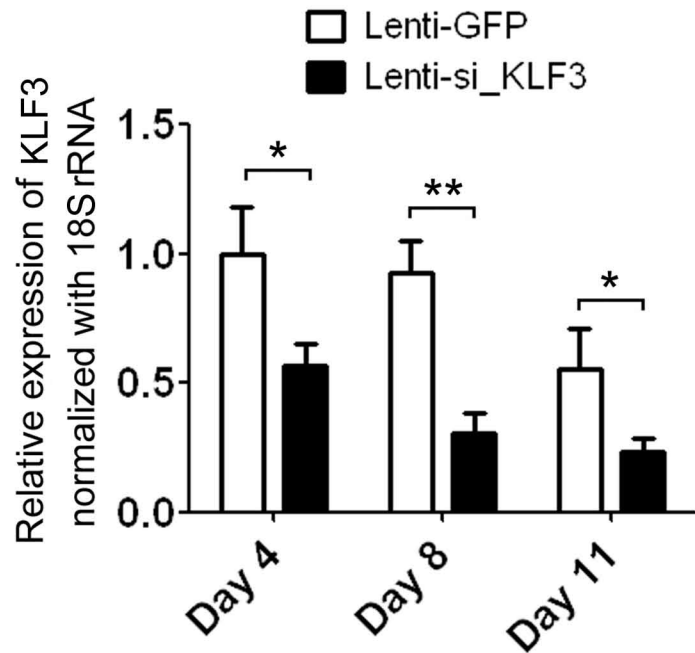

B

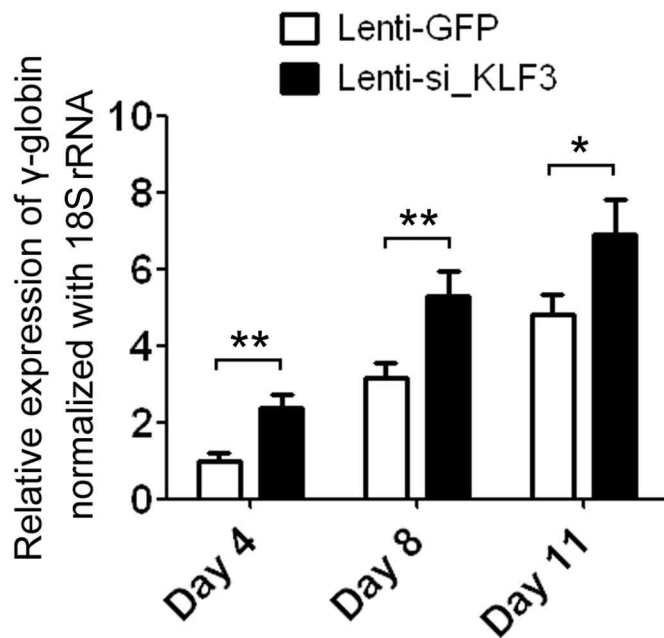

FIG. S6 The relative expression of KLF3 and  $\gamma$ -globin gene was normalized with 18S rRNA in lentivirus-infected human CD34<sup>+</sup> HPCs after Epo induction for 4, 8 and 11 days.
