# Supplementary material
Source: PubMed Central journal article supplement (PMC3811682)
Supplement: MCB.00623-13_zmb999100147so7.pdf [file MCB.00623-13_zmb999100147so7.pdf]

**Table S1 microRNAs consistently increased or decreased in K562 cells at 0, 24, 48 and 72 hours post hemin induction.**

| <b>microRNAs consistently increased or decreased in K562 cells at hemin-induction 0, 24, 48 and 72 hours</b> |         |         |         |         |        |         |         |
|--------------------------------------------------------------------------------------------------------------|---------|---------|---------|---------|--------|---------|---------|
| ID                                                                                                           | 0h      | 24h     | 48h     | 72h     | 24h/0h | 48h/24h | 72h/48h |
| hsa-let-7a                                                                                                   | 3759.50 | 3243.92 | 1199.99 | 1204.23 | 0.86   | 0.37    | 1.00    |
| hsa-let-7e                                                                                                   | 1481.93 | 1263.39 | 209.96  | 289.96  | 0.85   | 0.17    | 1.38    |
| hsa-miR-10a*                                                                                                 | 1334.59 | 396.38  | 376.88  | 704.20  | 0.30   | 0.95    | 1.87    |
| hsa-miR-1260                                                                                                 | 1389.89 | 4703.35 | 3628.57 | 4711.77 | 3.38   | 0.77    | 1.30    |
| hsa-miR-1274b                                                                                                | 796.07  | 2469.89 | 3577.62 | 6024.38 | 3.10   | 1.45    | 1.68    |
| hsa-miR-1275                                                                                                 | 2574.53 | 1893.42 | 579.21  | 678.11  | 0.74   | 0.31    | 1.17    |
| hsa-miR-128                                                                                                  | 463.15  | 2599.28 | 4259.54 | 5181.83 | 5.61   | 1.64    | 1.22    |
| hsa-miR-1285                                                                                                 | 4570.87 | 754.77  | 136.65  | 130.09  | 0.17   | 0.18    | 0.95    |
| hsa-miR-1304                                                                                                 | 3806.74 | 549.25  | 19.97   | 26.10   | 0.14   | 0.04    | 1.31    |
| hsa-miR-132                                                                                                  | 574.52  | 3971.26 | 3388.18 | 3689.65 | 6.91   | 0.85    | 1.09    |
| hsa-miR-135a*                                                                                                | 1145.49 | 84.48   | 47.25   | 17.18   | 0.07   | 0.56    | 0.36    |
| hsa-miR-140-3p                                                                                               | 600.53  | 1829.66 | 1067.83 | 857.23  | 3.05   | 0.58    | 0.80    |
| hsa-miR-145                                                                                                  | 68.96   | 1908.04 | 1960.17 | 2683.48 | 27.67  | 1.03    | 1.37    |
| hsa-miR-148a                                                                                                 | 44.15   | 876.82  | 2711.72 | 3544.60 | 19.86  | 3.09    | 1.31    |
| hsa-miR-15b                                                                                                  | 469.90  | 3327.68 | 3712.95 | 3462.66 | 7.08   | 1.12    | 0.93    |
| hsa-miR-15b*                                                                                                 | 961.26  | 2210.44 | 2233.65 | 2338.46 | 2.30   | 1.01    | 1.05    |
| hsa-miR-16-2*                                                                                                | 1569.02 | 3344.79 | 2996.12 | 3137.35 | 2.13   | 0.90    | 1.05    |
| hsa-miR-17*                                                                                                  | 648.80  | 2007.87 | 1610.33 | 1849.22 | 3.09   | 0.80    | 1.15    |
| hsa-miR-181a-2*                                                                                              | 35.49   | 2330.42 | 1409.71 | 2156.82 | 65.66  | 0.60    | 1.53    |
| hsa-miR-183                                                                                                  | 2019.24 | 3755.21 | 1724.51 | 1749.67 | 1.86   | 0.46    | 1.01    |
| hsa-miR-18b                                                                                                  | 1429.49 | 3400.59 | 2541.10 | 2892.65 | 2.38   | 0.75    | 1.14    |
| hsa-miR-196a                                                                                                 | 1454.25 | 3744.43 | 2572.92 | 1958.13 | 2.57   | 0.69    | 0.76    |
| hsa-miR-19b                                                                                                  | 443.33  | 1485.98 | 1331.18 | 2161.99 | 3.35   | 0.90    | 1.62    |
| hsa-miR-20a*                                                                                                 | 55.80   | 1155.00 | 2787.76 | 3352.64 | 20.70  | 2.41    | 1.20    |
| hsa-miR-223*                                                                                                 | 4006.11 | 1750.36 | 993.68  | 1169.32 | 0.44   | 0.57    | 1.18    |
| hsa-miR-23a                                                                                                  | 1180.98 | 3628.68 | 3225.98 | 3778.96 | 3.07   | 0.89    | 1.17    |
| hsa-miR-23b                                                                                                  | 2533.70 | 1089.69 | 1309.71 | 1677.68 | 0.43   | 1.20    | 1.28    |
| hsa-miR-27a                                                                                                  | 1433.00 | 3667.27 | 3449.59 | 3113.04 | 2.56   | 0.94    | 0.90    |
| hsa-miR-299-3p                                                                                               | 2667.69 | 44.99   | 25.47   | 21.61   | 0.02   | 0.57    | 0.85    |
| hsa-miR-30b                                                                                                  | 1412.70 | 3478.52 | 3703.35 | 3976.69 | 2.46   | 1.06    | 1.07    |
| hsa-miR-30d                                                                                                  | 2914.12 | 6166.25 | 4851.67 | 5881.25 | 2.12   | 0.79    | 1.21    |
| hsa-miR-323-3p                                                                                               | 234.63  | 978.50  | 1098.10 | 1853.81 | 4.17   | 1.12    | 1.69    |
| hsa-miR-324-3p                                                                                               | 991.45  | 3019.89 | 2744.03 | 3250.43 | 3.05   | 0.91    | 1.18    |
| hsa-miR-331-3p                                                                                               | 1365.44 | 406.89  | 294.55  | 586.11  | 0.30   | 0.72    | 1.99    |
| hsa-miR-342-5p                                                                                               | 1152.76 | 1060.17 | 301.67  | 230.50  | 0.92   | 0.28    | 0.76    |
| hsa-miR-370                                                                                                  | 885.37  | 3425.18 | 2876.76 | 3844.88 | 3.87   | 0.84    | 1.34    |
| hsa-miR-374a                                                                                                 | 41.11   | 93.74   | 526.43  | 1748.40 | 2.28   | 5.62    | 3.32    |

|                |         |         |          |          |       |       |      |
|----------------|---------|---------|----------|----------|-------|-------|------|
| hsa-miR-376a   | 1268.97 | 2808.49 | 1533.18  | 2979.02  | 2.21  | 0.55  | 1.94 |
| hsa-miR-379    | 2433.40 | 2892.73 | 828.24   | 1164.38  | 1.19  | 0.29  | 1.41 |
| hsa-miR-380    | 1049.94 | 2156.65 | 1725.95  | 2592.18  | 2.05  | 0.80  | 1.50 |
| hsa-miR-382    | 3886.27 | 2771.18 | 1313.83  | 940.97   | 0.71  | 0.47  | 0.72 |
| hsa-miR-421    | 512.81  | 3943.96 | 2508.19  | 2982.30  | 7.69  | 0.64  | 1.19 |
| hsa-miR-423-5p | 3879.32 | 2675.93 | 2897.82  | 871.67   | 0.69  | 1.08  | 0.30 |
| hsa-miR-425    | 281.50  | 4908.03 | 4604.99  | 6191.85  | 17.44 | 0.94  | 1.34 |
| hsa-miR-431    | 154.27  | 1451.42 | 1564.31  | 1981.17  | 9.41  | 1.08  | 1.27 |
| hsa-miR-451    | 154.37  | 992.72  | 2207.40  | 3172.70  | 6.43  | 2.22  | 1.44 |
| hsa-miR-486-3p | 4663.98 | 3756.60 | 5178.77  | 1375.20  | 0.81  | 1.38  | 0.27 |
| hsa-miR-502-3p | 40.25   | 1329.30 | 1054.65  | 1116.72  | 33.03 | 0.79  | 1.06 |
| hsa-miR-550    | 2909.79 | 1635.28 | 704.03   | 1224.24  | 0.56  | 0.43  | 1.74 |
| hsa-miR-550*   | 5439.32 | 1161.99 | 418.40   | 722.36   | 0.21  | 0.36  | 1.73 |
| hsa-miR-551a   | 3115.88 | 745.74  | 49.23    | 61.44    | 0.24  | 0.07  | 1.25 |
| hsa-miR-624*   | 12.05   | 503.91  | 2338.21  | 4542.04  | 41.82 | 4.64  | 1.94 |
| hsa-miR-628-3p | 2353.82 | 5511.33 | 3186.07  | 3284.82  | 2.34  | 0.58  | 1.03 |
| hsa-miR-654-3p | 48.15   | 145.04  | 1611.67  | 998.01   | 3.01  | 11.11 | 0.62 |
| hsa-miR-7-1*   | 4129.15 | 9200.94 | 15171.79 | 10970.14 | 2.23  | 1.65  | 0.72 |
| hsa-miR-744    | 1009.80 | 764.34  | 289.56   | 348.76   | 0.76  | 0.38  | 1.20 |
| hsa-miR-766    | 32.81   | 1345.45 | 712.58   | 1071.67  | 41.01 | 0.53  | 1.50 |
| hsa-miR-877    | 2449.78 | 2539.11 | 688.59   | 533.81   | 1.04  | 0.27  | 0.78 |
| hsa-miR-889    | 2016.54 | 5953.19 | 7559.15  | 8944.37  | 2.95  | 1.27  | 1.18 |
| hsa-miR-9*     | 423.05  | 411.41  | 673.24   | 2098.98  | 0.97  | 1.64  | 3.12 |
| hsa-miR-923    | 1768.49 | 922.31  | 170.25   | 261.91   | 0.52  | 0.18  | 1.54 |
| hsa-miR-99b    | 481.01  | 990.02  | 849.17   | 1006.48  | 2.06  | 0.86  | 1.19 |
