# Supplementary material
Source: PubMed Central journal article supplement (PMC3811682)
Supplement: MCB.00623-13_zmb999100147so8.pdf [file MCB.00623-13_zmb999100147so8.pdf]

**Table S2. Primer and probe sequence used for qRT-PCR, constructs, ChIP-PCR and EMSA.**

| <b>Primer information about qRT-PCR</b>                                      |                                                          |
|------------------------------------------------------------------------------|----------------------------------------------------------|
| hsa-miR-23aRT                                                                | GTCGTATCCAGTGCAGGGTCCGAGGTATTTCGCACTGGATAC<br>GACGGAAAT  |
| hsa-miR-23a F                                                                | GCGCATCACATTGCCAGGG                                      |
| has-miR-23a R                                                                | CAGTGCAGGGTCCGAGGT                                       |
| hsa-miR-27aRT                                                                | GTCGTATCCAGTGCAGGGTCCGAGGTATTTCGCACTGGATAC<br>GACGCGGAAA |
| hsa-miR-27a F                                                                | TGCGCTTCACAGTGGCTAAGG                                    |
| has-miR-27a R                                                                | CAGTGCAGGGTCCGAGGT                                       |
| U6 snRNA RT                                                                  | AAAATATGGAACGCTTCACGAATTTG                               |
| U6 snRNA F                                                                   | CTCGCTTCGGCAGCACATATACT                                  |
| U6 snRNA R                                                                   | ACGCTTCACGAATTTGCGTGTC                                   |
| 18S rRNA RT                                                                  | TAATGATCCTTCCGCA                                         |
| 18S rRNA F                                                                   | CGATAACGAACGAGACTCTGGC                                   |
| 18S rRNA R                                                                   | CGGACATCTAAGGGCATCACA                                    |
| Primary miR-23a cluster F                                                    | TTCACAGTGGCTAAGTTCCGC                                    |
| Primary miR-23a cluster R                                                    | TTCAGCTCAGTAGGCACGGG                                     |
| KLF3 F                                                                       | AAGCTCCCACTTGAAAGCACA                                    |
| KLF3 R                                                                       | CATCAGACCGAGCAAACCTTCC                                   |
| Sp1 F                                                                        | GCCGTTGGCTATAGCAAATGC                                    |
| Sp1 R                                                                        | CCTCTCCACCTGCTGTGTCA                                     |
| gamma-globin F                                                               | CAAAGCACCTGGATGATCTCAA                                   |
| gamma-globinR                                                                | TTGCCGAAATGGATTGCC                                       |
| epsilon-globin F                                                             | TGCTGACTTCCTTTGGAGATGC                                   |
| epsilon-globin R                                                             | CCATCACGTTACCCAGGAGC                                     |
| GAPDH F                                                                      | CCAGGTGGTCTCCTCTGACTTC                                   |
| GAPDH R                                                                      | CCCTGTTGCTGTAGCCAAATTC                                   |
| <b>Taqman Probes used in qRT-PCR (5' FAM, 3' MGB)</b>                        |                                                          |
| gamma-globin                                                                 | CACCTTTGCCAGCTGAGTG                                      |
| epsilon-globin                                                               | ACATGGACAACCTCAAGCCCG                                    |
| GAPDH                                                                        | ACAGCGACACCCACTCCTCC                                     |
| 18S rRNA                                                                     | CTAACTAGTTACGCGACCCCGA                                   |
| <b>Primer information about 3' UTR cloning for luciferase reporter assay</b> |                                                          |
| KLF3_WT F                                                                    | TCTGTCCTGCCTCCCATTATCT                                   |
| KLF3_WT R                                                                    | CCCTTCCCTTGAAGTCTACAC                                    |
| KLF3_MUT S                                                                   | TCAGACCTAAAGTGCTTGACACTTTTTT                             |
| KLF3_MUT                                                                     | AAAAAAGTGT GCAAGCACTT TAGGTCTGA                          |

|                                                                                                |                             |
|------------------------------------------------------------------------------------------------|-----------------------------|
| A                                                                                              |                             |
| SP1_WT F                                                                                       | CGGCAGGGAACCTAGTGCAT        |
| SP1_WT R                                                                                       | CATATACGGGCATGAACACACATT    |
| SP1_MUT S                                                                                      | GAGCTTTTCTCGATTCGGAAGTGTG   |
| SP1_MUT A                                                                                      | CACACTTCCG AATCGAGAAA AGCTC |
| <b>Primer information about cDNA cloning for KLF3</b>                                          |                             |
| KLF3 F                                                                                         | CGTAAGCTTAGAATGCTCATGTTTG   |
| KLF3 R                                                                                         | ACTCTCGAGACTAGCATGTGGC      |
| <b>Primer information about cloned wild-type and mutant promoter region of miR-23a cluster</b> |                             |
| Promoter-WT F                                                                                  | AACTGAGGCTTTGGAGAGTCTTTG    |
| Promoter-WT R                                                                                  | TCCCCAGGAACCCCAGC           |
| Promoter-MUT(-569) S                                                                           | GGCTGTTTGAACGGAGAGGCCTG     |
| Promoter-MUT(-569) A                                                                           | CAGGCCTCTC CGTTCAAACA GCC   |
| Promoter-MUT(-517) S                                                                           | GGGCGGGGTTAGCGTGTCTAGA      |
| Promoter-MUT(-517) A                                                                           | TCTAGACACG CTAACCCCGC CCC   |
| Promoter-MUT(-493) S                                                                           | AAGAGAGGGGTAAGCCTTGCTGC     |
| Promoter-MUT(-493) A                                                                           | GCAGCAAGGC TTACCCCTCT CTT   |
| Promoter-MUT(-463) S                                                                           | CGCCCTGGTGTAAAGTGGGCTAAG    |
| Promoter-MUT(-463) A                                                                           | CCCAC TTACACCAGG GCG GATGC  |
| Promoter-MUT(-360) S                                                                           | CGCCAGCTGGTTCGAGATCACTT     |
| Promoter-MUT(-360) A                                                                           | ATCTC GAACCAGCTG GCG CCACT  |
| Promoter-MUT(-343) S                                                                           | TCACTTCCTCTATCGCCTGCCTG     |
| Promoter-MUT(-343) A                                                                           | CAGGCAGGCG ATAGAGGAAG TGA   |
| <b>Primer information of ChIP-PCR for KLF3</b>                                                 |                             |
| HS2 F                                                                                          | TGCCCTGTAAGCATCCTGC         |
| HS2 R                                                                                          | CAAACCTTCTGGCTCAAGCAC       |
| HS3 F                                                                                          | AGCCTGCCAGCCTATAACCC        |
| HS3 R                                                                                          | TCAGCAAACACAAGACCCTCAC      |
| 23a promoter-I F                                                                               | CCAGAGCACAGGATCCAAGC        |
| 23a promoter-I R                                                                               | TCTTTGGGAAACTGTGGAGCA       |
| 23a promoter-II F                                                                              | GCTGGCGCCACTTCCTAGAA        |
| 23a promoter-II R                                                                              | GCTTGGATCCTGTGCTCTGG        |
| 23a promoter-III F                                                                             | ATGCGGGACAAGGAGGCTA         |
| 23a promoter-III R                                                                             | TTCTAGGAAGTGGCGCCAGC        |
| HS4 F                                                                                          | TGGCATCTAGCGCAATGACTT       |
| HS4 R                                                                                          | GGGCAAGCCATCTCATAGCTG       |
| <b>Primer information of ChIP-PCR for Sp1</b>                                                  |                             |
| HS1 F                                                                                          | CTGAGAAGGCAATAGCAGGAGC      |
| HS1 R                                                                                          | GACACTAGTGTACCAGTCTCC       |
| HS2 F                                                                                          | CTGTGTGTCTCCATTAGTGACCTCCC  |

|                                     |                           |
|-------------------------------------|---------------------------|
| HS2 R                               | TGATGCCGTTTGAGGTGGAGTTTTA |
| HS3 F                               | CAGGAGTCTCTAAGGACTTGG     |
| HS3 R                               | CATAGGAGTCAAGGCACTTGC     |
| HS4 F                               | TGGCATCTAGCGCAATGACTT     |
| HS4 R                               | GGGCAAGCCATCTCATAGCTG     |
| HS5 F                               | GACCTATATCTGGCAGGAC       |
| HS5 R                               | GTGATGTCTTACTAACTAGC      |
| epsilon-globin<br>promoter F        | GAGCCTCAGGATCCAGCACAC     |
| epsilon-globin<br>promoter R        | GATGCCAGGCCTGAGAGCTTGC    |
| gamma-globin<br>promoter F          | ATTAGCAGCAGTATCCTC        |
| gamma-globin<br>promoter R          | GGCGTCTGGACTAGGAGC        |
| 23a promoter-III F                  | ATGCGGGACAAGGAGGCTA       |
| 23a promoter-III R                  | TTCTAGGAAGTGGCGCCAGC      |
| <b>Probe sequence used for EMSA</b> |                           |
| Probes_W<br>T                       | CAGGCCTCTCCACCCAAACAGCCCA |
| Probes_M<br>UT                      | CAGGCCTCTCATTGGAAACAGCCCA |
